# Supplementary material
Source: PubMed Central journal article supplement (PMC3351342)
Supplement: supp_M111.338145_jbc.M111.338145-3.pdf [file supp_M111.338145_jbc.M111.338145-3.pdf]

**SUPPLEMENTAL TABLE 2**

| dATP<br>Tk primase preparation           | [ $\alpha^{32}\text{P}$ ]-ATP | [ $\alpha^{32}\text{P}$ ]-<br>incorporation (pmol) |
|------------------------------------------|-------------------------------|----------------------------------------------------|
| Tk primase complex (0.56 $\mu\text{M}$ ) | 838                           | 1049                                               |
| " " (0.056 $\mu\text{M}$ )               | 389                           | 608                                                |
| Tk p41 (0.56 $\mu\text{M}$ )             | 27.1                          | 925                                                |
| " (0.056 $\mu\text{M}$ )                 | 12.2                          | 242                                                |

*RNA and DNA synthesis with oligo dT<sub>30</sub> as template* - Reaction mixtures (20  $\mu\text{l}$ ) containing 40 mM glycine (pH 8.9), 100  $\mu\text{M}$  [ $\alpha^{32}\text{P}$ ]-ATP (665 cpm/pmol) or [ $\alpha^{32}\text{P}$ ]-dATP (2500 cpm/pmol), 1  $\mu\text{M}$  oligo dT<sub>30</sub>, 10 mM magnesium acetate, 4 mM MnCl<sub>2</sub>, 100  $\mu\text{g/ml}$  BSA, 1 mM DTT and Tk primase preparations diluted in TE+BSA (20  $\mu\text{g/ml}$ ) were incubated for 20 min at 60°C. Aliquots were used to measure the level of polynucleotides synthesized.
