# Supplementary material
Source: PubMed Central journal article supplement (PMC3351342)
Supplement: supp_M111.338145_jbc.M111.338145-4.pdf [file supp_M111.338145_jbc.M111.338145-4.pdf]

**SUPPLEMENTAL TABLE 3**

| Product analyzed                      | Treatment | Acid-insoluble<br>(pmol) |
|---------------------------------------|-----------|--------------------------|
| [ $\gamma^{32}\text{P}$ ]-ATP-labeled | none      | 2.79                     |
| [ $\gamma^{32}\text{P}$ ]-ATP-labeled | CIP       | <0.2                     |
| [ $\alpha^{32}\text{P}$ ]-ATP-labeled | none      | 10.4                     |
| [ $\alpha^{32}\text{P}$ ]-ATP-labeled | CIP       | 10.2                     |

*Influence of CIP on oligo rA products* - Reaction mixtures (10  $\mu\text{l}$ ) containing 10 mM Tris-HCl (pH 8.5), 0.5 mM magnesium acetate, 2.83 pmol [ $\gamma^{32}\text{P}$ ]-ATP labeled oligo-rA product (17,400 cpm) or 10.8 pmol of [ $\alpha^{32}\text{P}$ ]-ATP labeled oligo rA (7860 cpm) were incubated with CIP (3U, where indicated) for 30 min at 37°C. Aliquots were subjected to analysis using DE-81 paper.
