# Supplementary material
Source: PubMed Central journal article supplement (PMC3351342)
Supplement: supp_M111.338145_jbc.M111.338145-5.pdf [file supp_M111.338145_jbc.M111.338145-5.pdf]

**SUPPLEMENTAL TABLE 4**

| <u>Solvent used in TLC separation</u> | <u>Region Isolated</u> | <u><sup>32</sup>P content (cpm)</u> |
|---------------------------------------|------------------------|-------------------------------------|
| 1) 0.5 M ammonium formate, pH 3.5     | Ap (2', 3' mixture)    | 64,450                              |
|                                       | pAp (2', 3' mixture)   | 3,100                               |
| 2) 1 M HCOOH, 0.3 M LiCl              | Ap (2', 3' mixture)    | 62,600                              |
|                                       | pAp (2', 3' mixture)   | 2,800                               |

*TLC separation of products formed after alkaline hydrolyse of <sup>32</sup>P-oligo rA* - Oligo rA was synthesized as described in Fig. 4A (lane 6) with [ $\alpha^{32}\text{P}$ ]-ATP and the products precipitated with alcohol. The alcohol precipitated material was washed twice with 70% alcohol and dried *in vacuo*. The pellet was suspended in 20  $\mu\text{l}$  of 0.3 M KOH and incubated at 37°C for 18 h and then neutralized with 1N HCl. The mixture was supplemented with 5  $\mu\text{mol}$  each of Ap (2', 3' mixture), pAp (2', 3' mixture) and adenosine tetraphosphate (ppppA). Aliquots (1.0  $\mu\text{l}$ ) were added to PEI cellulose strips and subjected to TLC separation in 0.5 M ammonium formate (pH 3.5) (solvent 1) or 1 M HCOOH, 0.3 M LiCl (solvent 2). Regions coincident with the added markers were excised and counted. Reactions lacking oligo dT<sub>30</sub> or enzyme were also carried through the same procedure; no radioactivity was detected in the Ap (2', 3') or pAp (2', 3' mixture) region while the ppppA region contained ~600 cpm in the control and in the incubated samples. We interpret this to represent contamination with [ $\alpha^{32}\text{P}$ ]-ATP and for this reason analyses of the tetraphosphate region are not presented. Based on the data presented above, the <sup>32</sup>P present in the pAp (2', 3' mixture) regions represents 4.8% and 4.5% (in 1 and 2), respectively, of the label present in the Ap (2', 3' mixture) regions. As pAp (2', 3' mixture) includes two phosphate residues present in the oligo rA chains, 50% of the <sup>32</sup>P recovered in this region represents the 5'-end. Thus, based on the findings that oligo rA chains formed were ~20-nt long (average), they contained ~50% of the calculated 5'-phosphate ends.
